# Supplementary material
Source: bioRxiv or medRxiv preprint supplement (https://www.biorxiv.org/highwire/filestream/15991/field_highwire_adjunct_files/0/055962-1.pdf)
Supplement: Supplementary file [file 055962-1.pdf]

## Supplementary Information

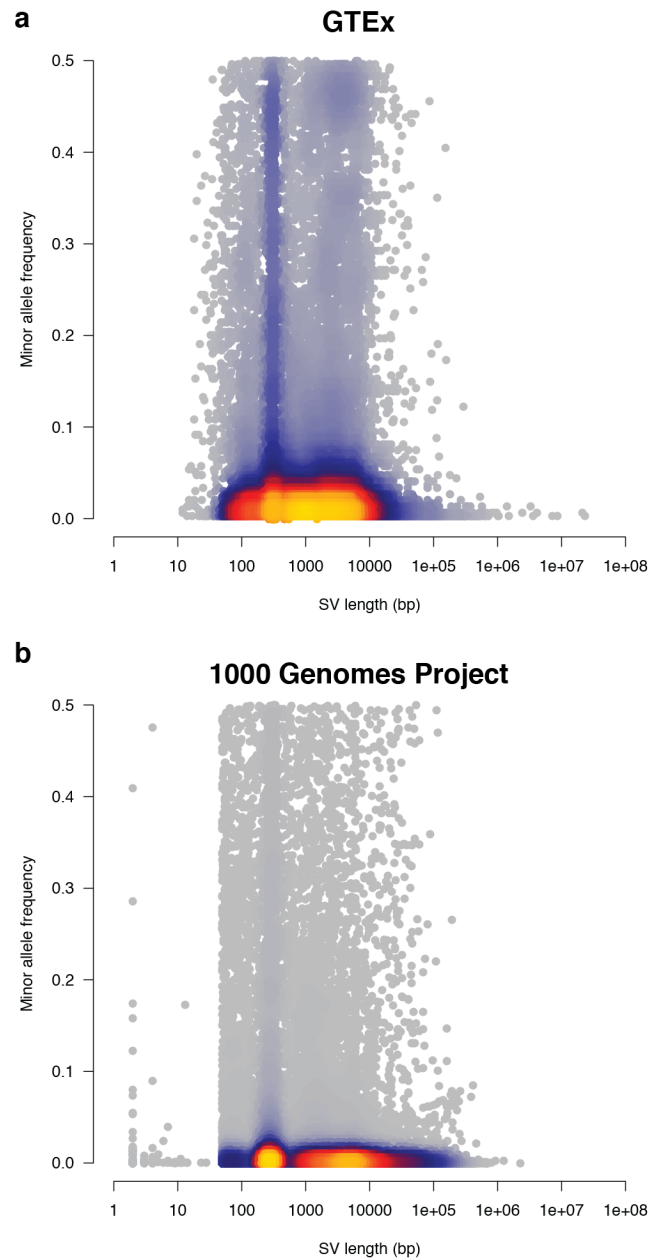

**Supplementary Figure 1.** Heat scatter plots of SV size by their minor allele frequency (MAF). Distributions show (a) the GTEx high confidence SV call set compared to (b) the 1000 Genomes Project SV call set from 2,504 individuals (Sudmant *et al.* 2015)

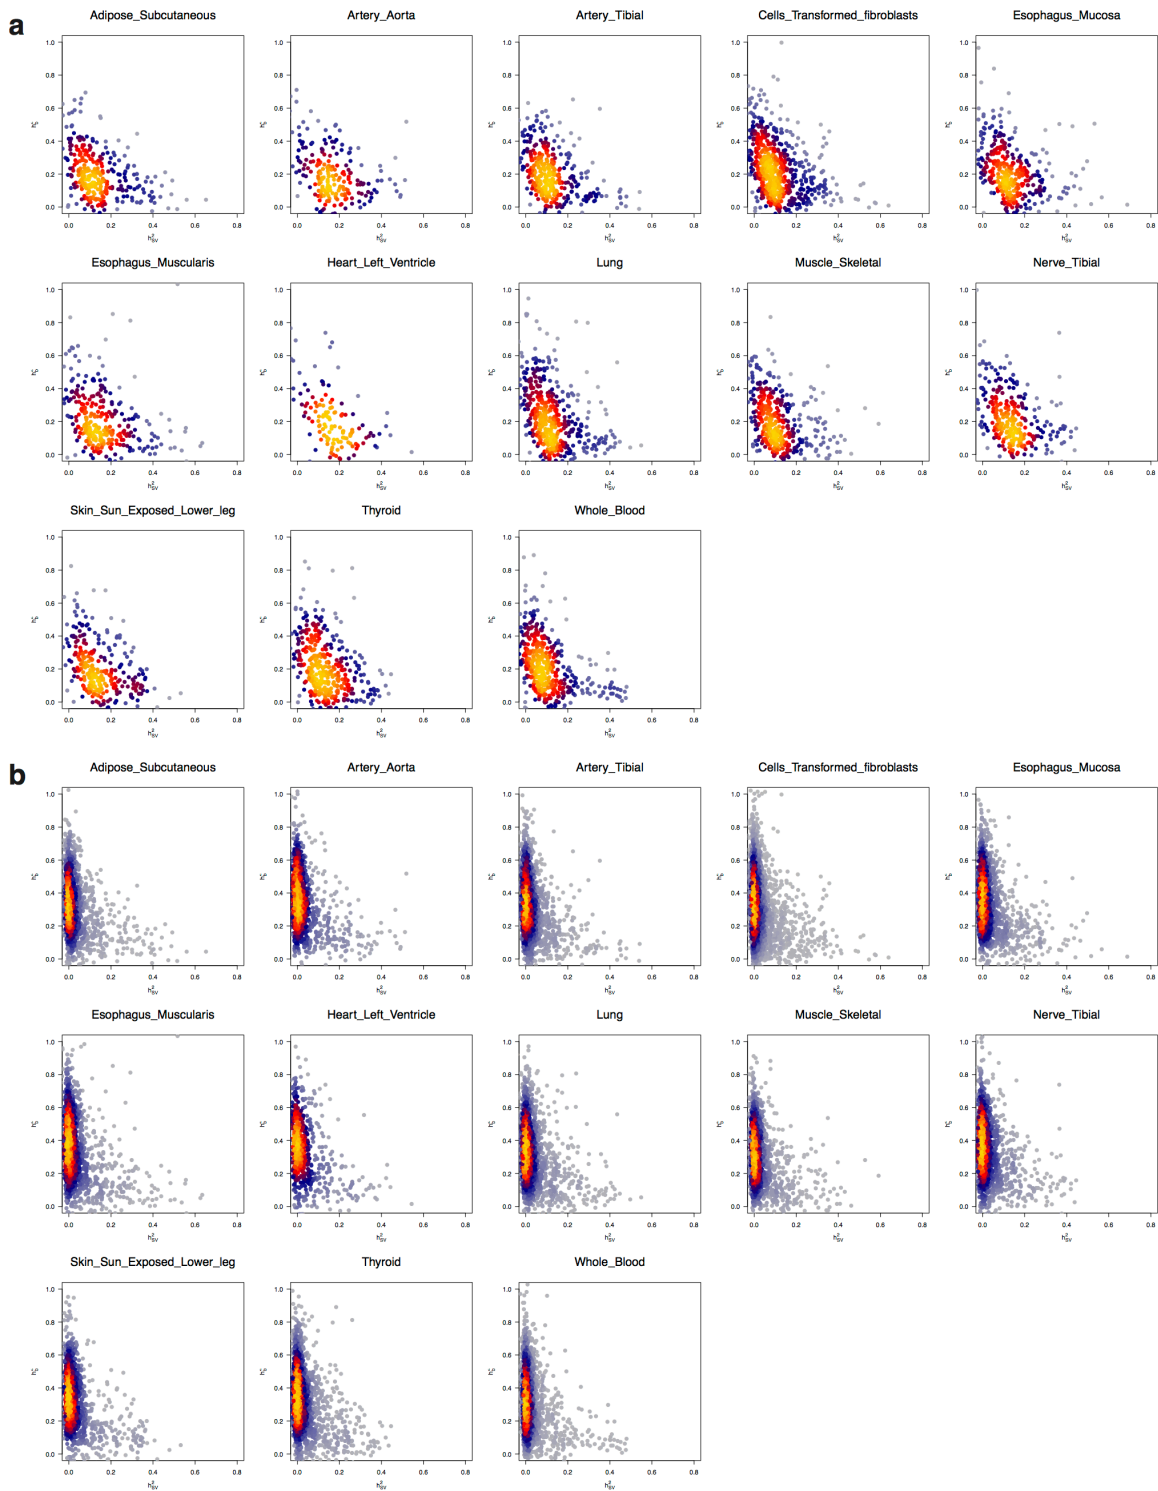

**Supplementary Figure 2.** Heat scatter plots (grouped by tissue) showing the heritability of each eQTL apportioned to the most significant SV in the *cis* window (x-axis) and the additive effect from the top 1,000 most significant SNVs and indels in the *cis* window for (a) SV-only and (b) joint eQTL mapping analyses.

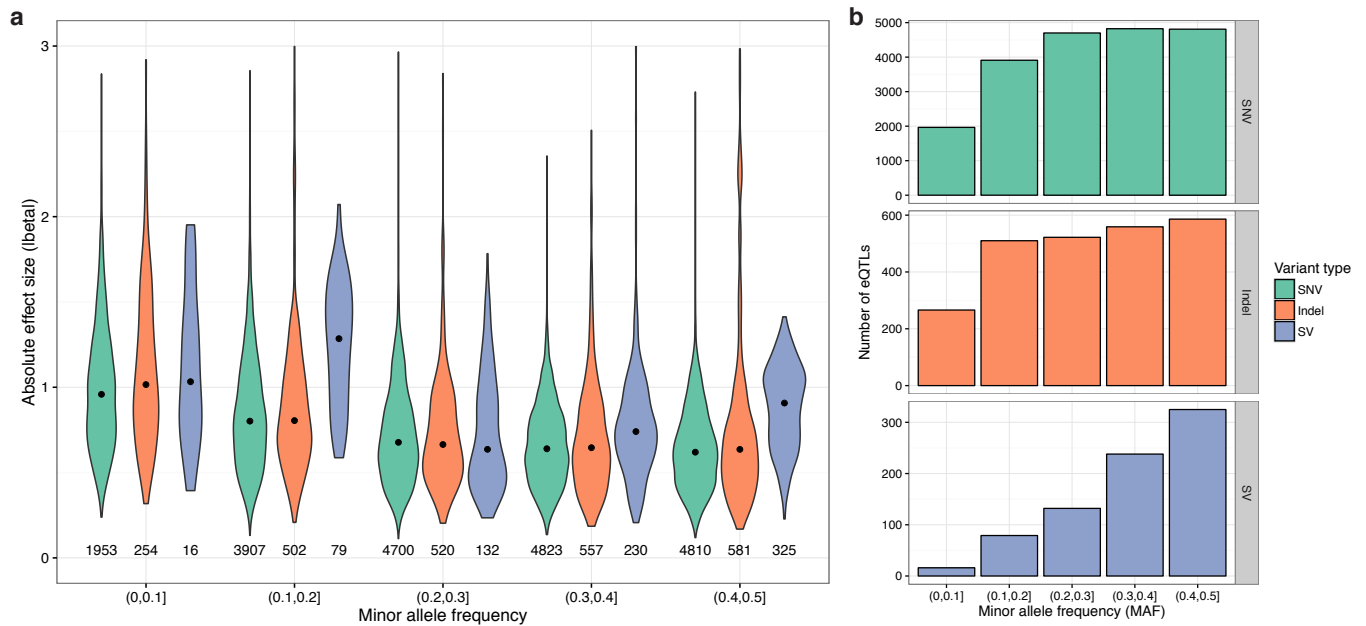

**Supplementary Figure 3.** Relationship between eQTL effect size and minor allele frequency (MAF). **(a)** Absolute effect size of joint eQTLs within each bin of minor allele frequency (MAF) for SVs, SNVs, and indels. Black dots represent the median of each distribution, and values beneath indicate the number of observations in each distribution. **(b)** Number of eQTLs in each bin of minor allele frequency, by variant type.

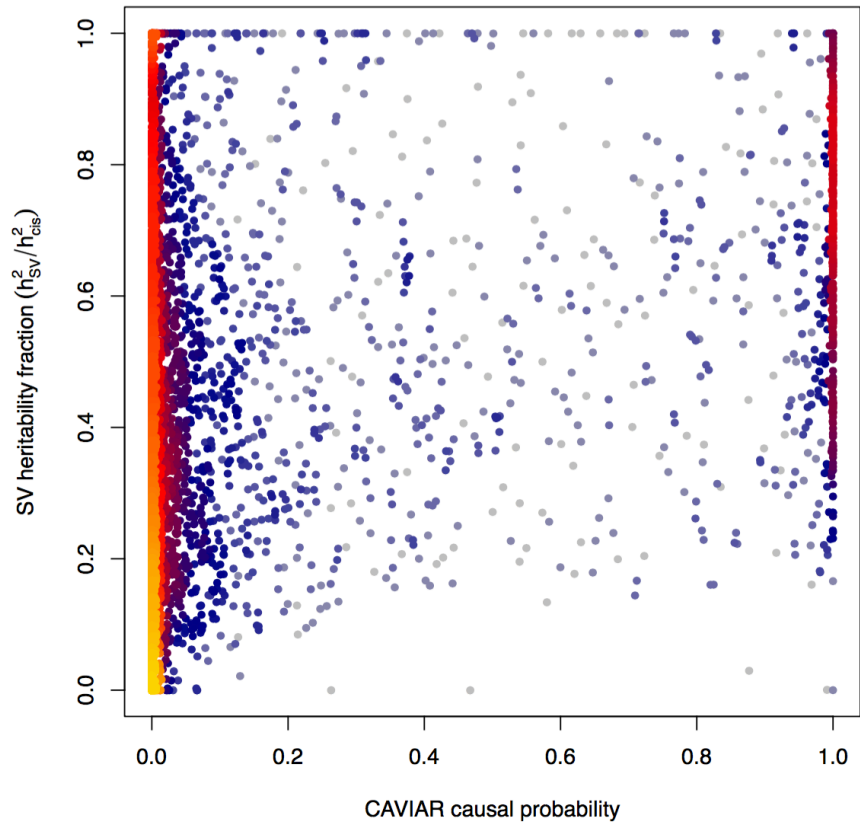

**Supplementary Figure 4.** Comparison between CAVIAR causal probabilities and the SV heritability fraction ( $h_{SV}^2/h_{cis}^2$ ) from the GCTA linear mixed model analysis.

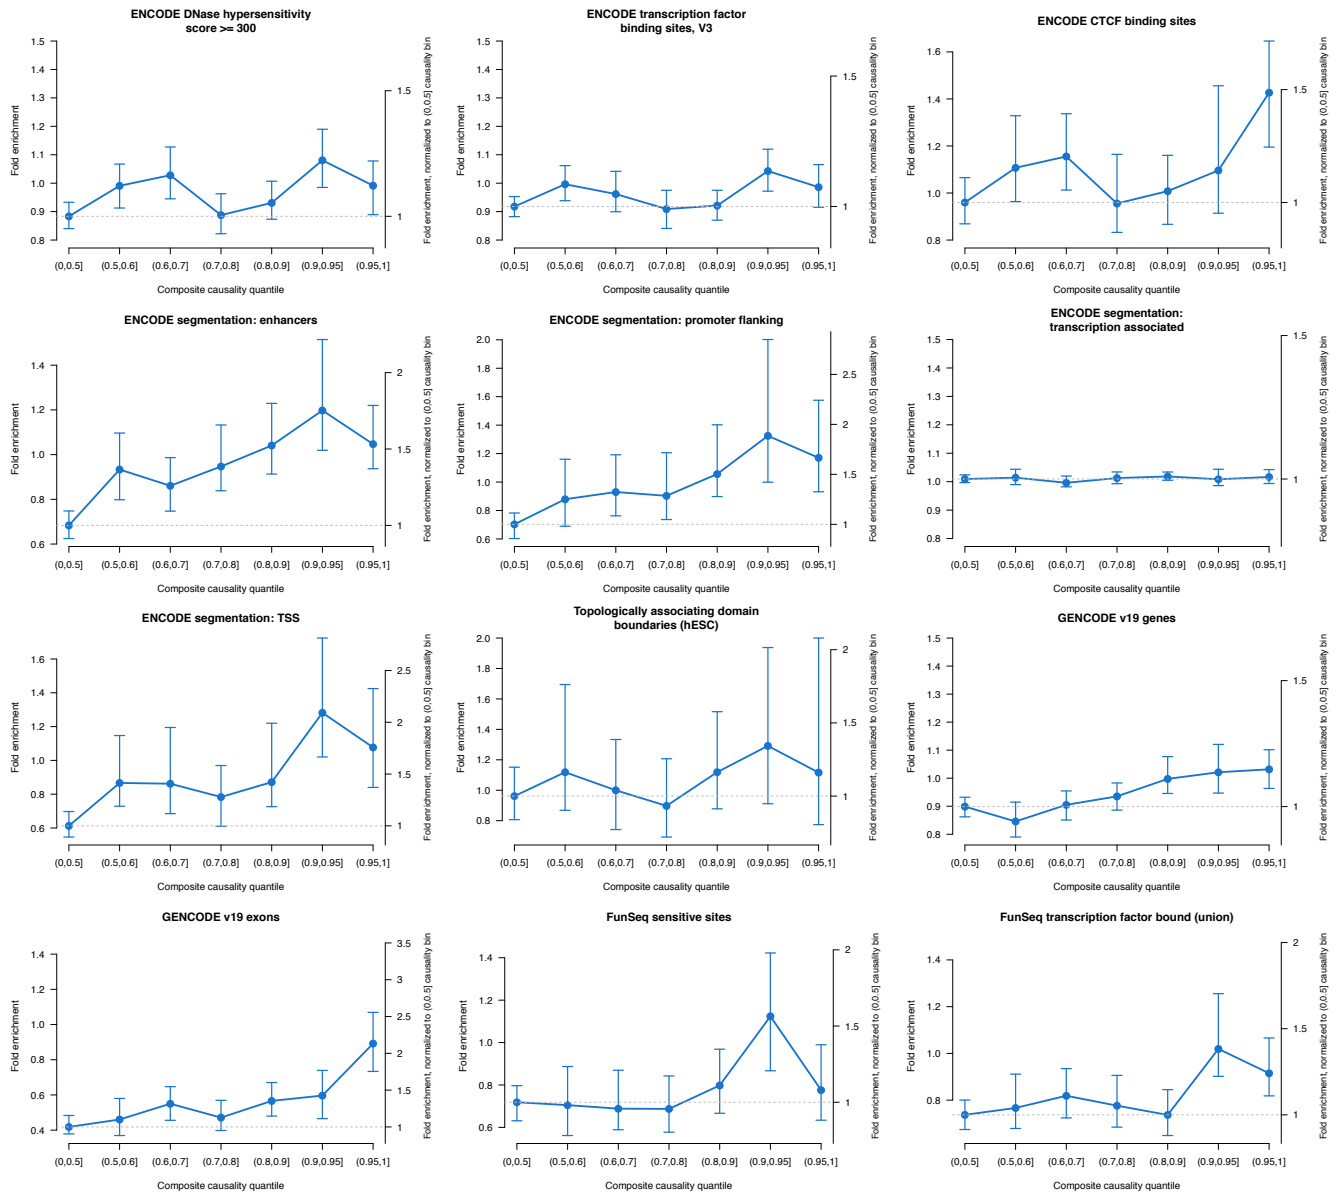

**Supplementary Figure 5.** Additional genomic features showing fold enrichment for SVs in each composite causality quantile bin compared to the median of 100 permutations with randomly shuffled genomic positions. SVs that overlap with exons of the eGene were excluded. Each annotated feature was allowed 1 kb of flanking sequence on either side for intersection, except GENCODE genes and GENCODE exons (no flanking sequence) and topologically associated domain boundaries (5 kb flanking sequence).

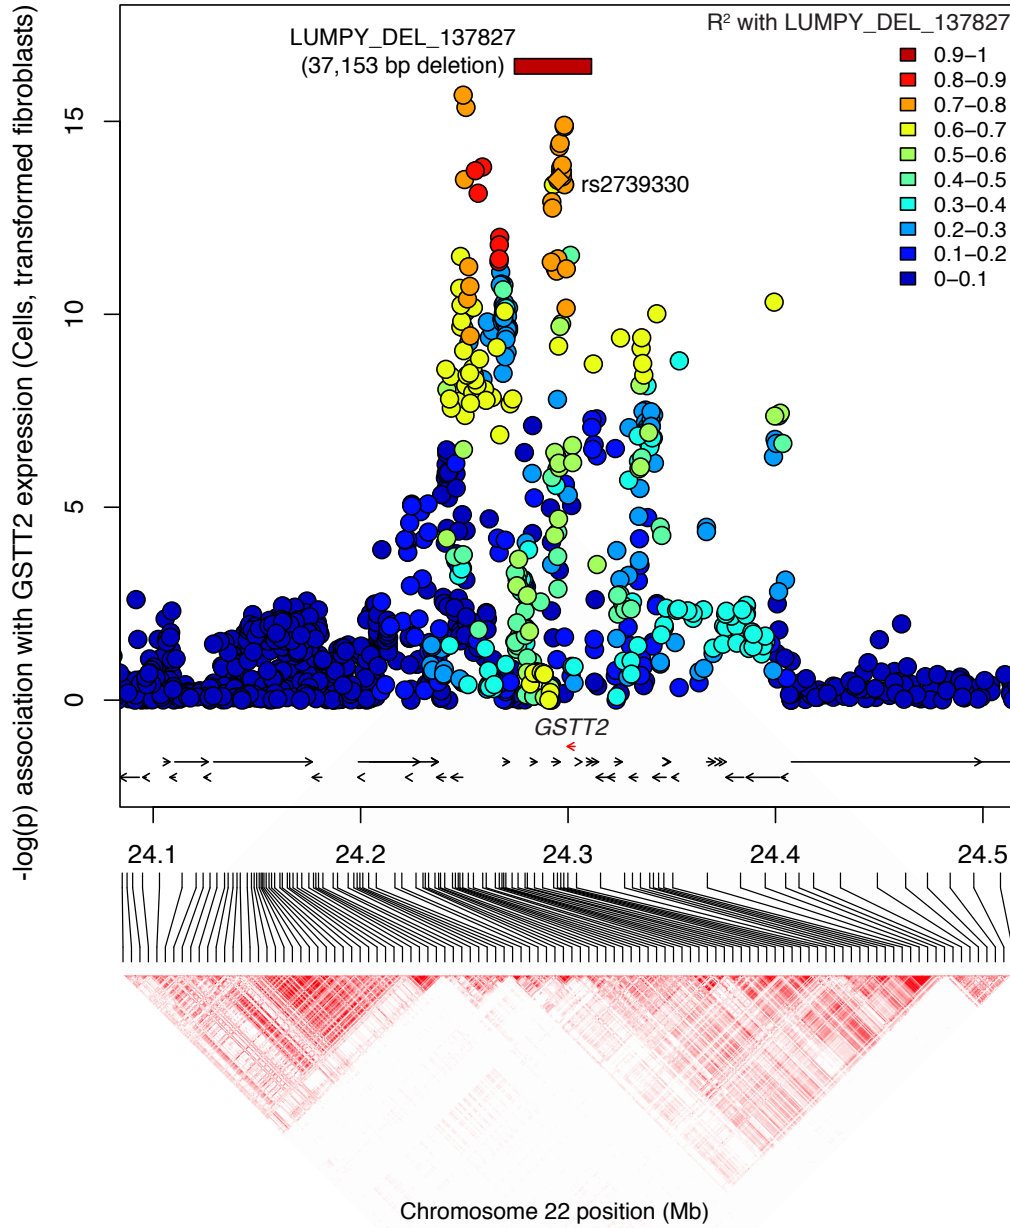

**Supplementary Figure 6.** A ~37 kb deletion of the GSTT2 (glutathione S-transferase theta-2) linked to a GWAS marker of circulating gamma-glutamyl transferase levels (rs2739440).

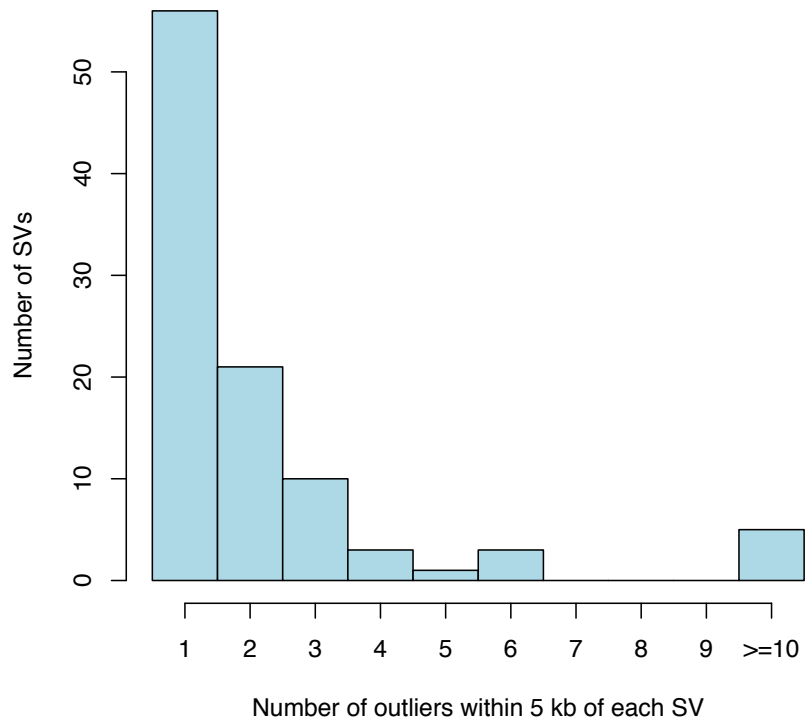

**Supplementary Figure 7.** Histogram showing the number of outlier genes per SV (among the SVs within 5 kb of an outlier gene in the same individual).

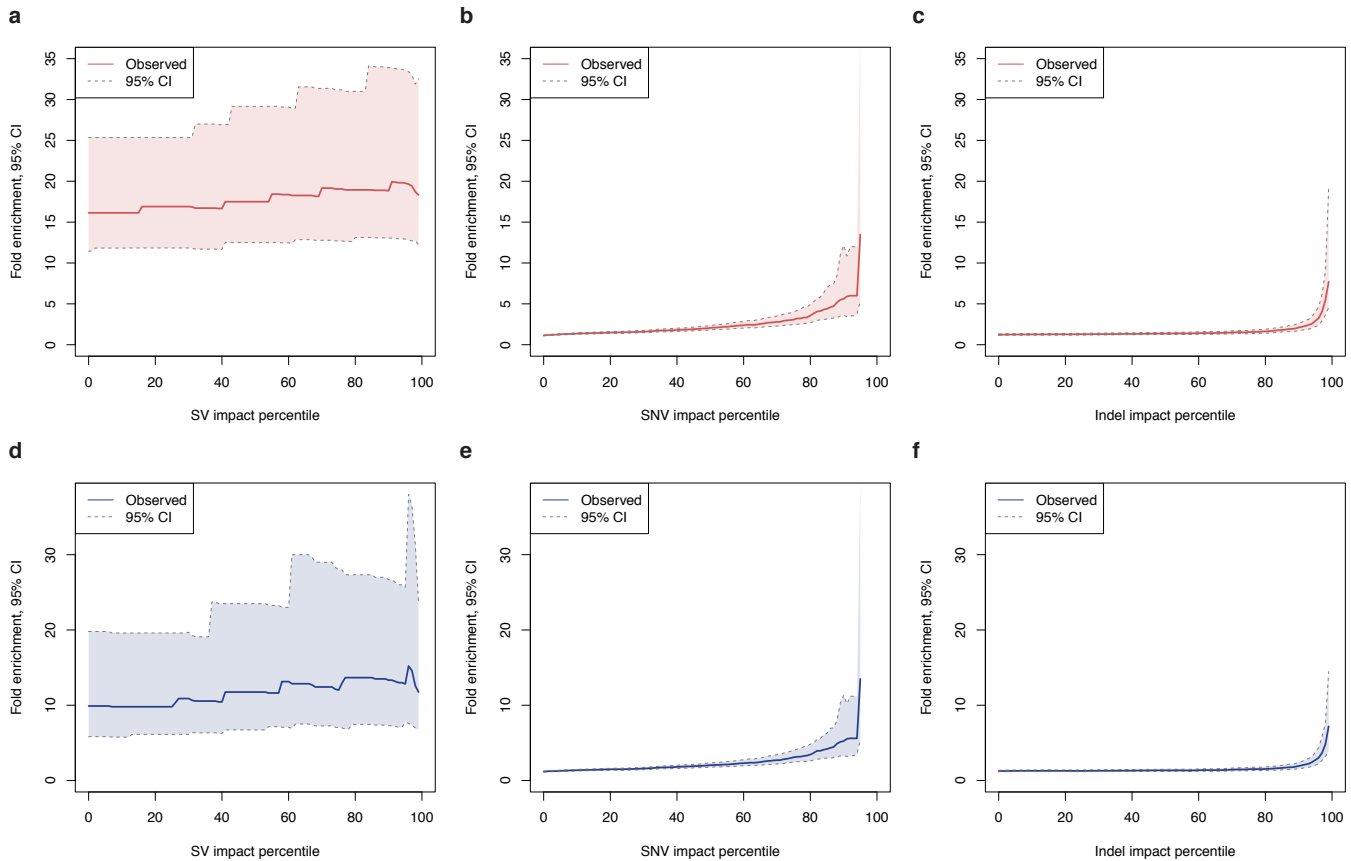

**Supplementary Figure 8.** Fold enrichment of rare variants within 5 kb of expression outliers for (a) SVs, (b) SNVs, and (c) indels gated on impact score percentile. Panels (d-f) show the fold enrichment of expression outliers within 5 kb of rare variants for (d) SVs, (e) SNVs, and (f) indels. For SVs, impact score percentile was based on the highest CADD scoring base in the affected interval and the confidence intervals around the SV breakpoints. For SNVs and indels the impact score percentile was derived from the CADD score of the variant.



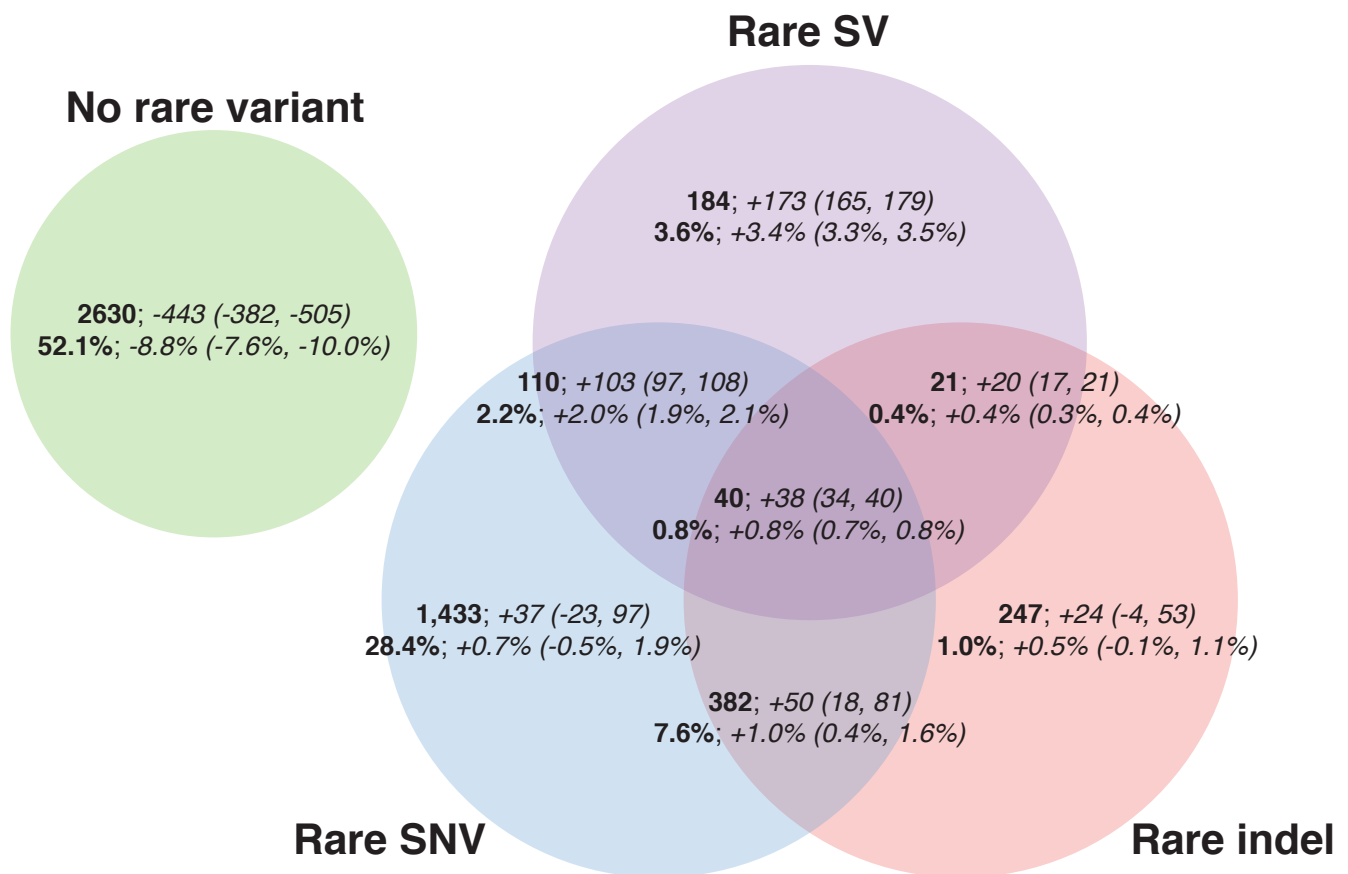

**Supplementary Figure 9.** Number and percent of gene expression outliers that have a rare variant of each type within 5 kb of the gene. For each area of the Venn diagram, bold text shows the number (top) and percent (bottom) of the 5,047 expression outliers observed to be within 5 kb of a rare variant in the same individual. Italic text shows the number and percentage of outliers in excess of the median from 1,000 random permutations of the outlier dataset, with the 95% confidence intervals in parentheses.

|             | Rare variant type | Num. outliers with rare variant within 5 kb | Num. outliers      | Shuffle median | Shuffle 2.5-%tile | Shuffle 97.5-%tile | Fold enrichment of outliers      | Fold enrichment (95% CI) |
|-------------|-------------------|---------------------------------------------|--------------------|----------------|-------------------|--------------------|----------------------------------|--------------------------|
| Per outlier | SV                | 355                                         | 5,047              | 22             | 14                | 31                 | 16.1                             | (11.5, 25.4)             |
|             | SNV               | 1,965                                       | 5,047              | 1,738          | 1,679             | 1,797              | 1.1                              | (1.1, 1.2)               |
|             | Indel             | 690                                         | 5,047              | 561            | 519               | 600                | 1.2                              | (1.2, 1.3)               |
|             | Any               | 2,417                                       | 5,047              | 1,974          | 1,912             | 2,035              | 1.2                              | (1.2, 1.3)               |
|             |                   |                                             |                    |                |                   |                    |                                  |                          |
|             | Rare variant type | Num. rare variants with outlier within 5 kb | Num. rare variants | Shuffle median | Shuffle 2.5-%tile | Shuffle 97.5-%tile | Fold enrichment of rare variants | Fold enrichment (95% CI) |
| Per variant | SV                | 99                                          | 4,691              | 10             | 5                 | 17                 | 9.9                              | (5.8, 19.8)              |
|             | SNV               | 4,188                                       | 4,830,727          | 3,536          | 3,349             | 3,762              | 1.2                              | (1.1, 1.3)               |
|             | Indel             | 917                                         | 824,836            | 727            | 664               | 786                | 1.3                              | (1.2, 1.4)               |
|             | Any               | 5,204                                       | 5,660,254          | 4,275          | 4,071             | 4,528              | 1.2                              | (1.1, 1.3)               |

**Supplementary Table 3.** Fold enrichment of the co-occurrence of gene expression outliers and rare variants in same sample on a per-outlier (top) and per-variant (bottom) basis. Shuffled medians and percentiles represent the number of co-occurrences expected by chance based on 1,000 random permutations of the outlier sample names.

|              | Type       | Variants | Outliers |
|--------------|------------|----------|----------|
| Deletions    | Simple     | 47       | 70       |
|              | Complex    | 3        | 4        |
| Duplications | Simple     | 32       | 263      |
|              | Complex    | 6        | 13       |
| Balanced     | Inversions | 2        | 4        |
|              | Complex    | 1        | 1        |

**Supplementary Table 4.** Distribution of simple and complex rearrangements associated with gene expression outliers. After clustering SVs into complex variants present in the same individual(s) and located no more than 100 kb away from each other, a total of 99 SVs associated with expression outliers were collapsed into 91 events.

| Cluster ID | Locus                                                                  | SV IDs                                                                                                                    | Sample    | Class       | Coding Region | Outlier Genes                                                  |
|------------|------------------------------------------------------------------------|---------------------------------------------------------------------------------------------------------------------------|-----------|-------------|---------------|----------------------------------------------------------------|
| 1565       | 1:25551621-25761207                                                    | LUMPY_BND_184573,<br>LUMPY_DUP_176134                                                                                     | GTEX-NPJ7 | Complex dup | Yes           | ENSG00000117614.5,<br>ENSG00000117616.13,<br>ENSG00000183726.6 |
| 1868       | 1:1388772-1429798                                                      | LUMPY_BND_93489,<br>LUMPY_DUP_175996                                                                                      | GTEX-XGQ4 | Complex dup | Yes           | ENSG00000215915.5                                              |
| 1902       | 20:32168930-55372800                                                   | LUMPY_DEL_135568,<br>LUMPY_DEL_136038                                                                                     | GTEX-P4QR | Complex del | Yes           | ENSG00000124126.9                                              |
| 258        | 11:47153961-47186142                                                   | LUMPY_BND_186174,<br>LUMPY_BND_186175,<br>GS_DEL_CNV_11_47153934_471<br>66318,<br>GS_DEL_CNV_11_47173052_471<br>86140     | GTEX-Q2AG | Complex del | Yes           | ENSG00000149179.9,<br>ENSG00000149182.10                       |
| 3276       | 6:127656006-127656010                                                  | LUMPY_BND_182569,<br>LUMPY_BND_193281                                                                                     | GTEX-OXRL | Balanced    | Yes           | ENSG00000093144.14                                             |
| 339        | 11:77413211-77786061                                                   | LUMPY_DUP_177173,<br>LUMPY_DUP_177174                                                                                     | GTEX-UPIC | Complex dup | Yes           | ENSG00000087884.10,<br>ENSG00000149262.12                      |
| 4274       | X:78417460-78425402                                                    | LUMPY_DEL_174258,<br>LUMPY_DEL_174259                                                                                     | GTEX-X8HC | Complex del | No            | ENSG00000147138.1                                              |
| 1126       | 16:26052128-26052227,<br>16:26457178-26551538,<br>16:26910809-27287111 | LUMPY_BND_119970,<br>LUMPY_BND_178606,<br>LUMPY_BND_188219,<br>LUMPY_BND_188221,<br>LUMPY_BND_188222,<br>LUMPY_DUP_178610 | GTEX-QV31 | Complex dup | Yes           | ENSG00000155666.7,<br>ENSG00000169189.12                       |
| 1629       | 19:50401535-50401536,<br>19:52871602-52970915                          | LUMPY_BND_179537,<br>LUMPY_DUP_179549                                                                                     | GTEX-X261 | Complex dup | Yes           | ENSG00000269834.1,<br>ENSG00000221923.4,<br>ENSG00000167555.9  |
| 4136       | X:100747271-100747272                                                  | LUMPY_BND_195398                                                                                                          | GTEX-OXRN | Complex dup | Yes           | ENSG00000196440.7,<br>ENSG00000198960.6                        |

**Supplementary Table 5.** Complex SVs associated with expression outliers. Complex SVs were identified by clustering rare SVs located no more than 100 kb away from each other and present in the same individual(s).
